# Supplementary material
Source: publisher figshare collection journal article supplement (https://sage.figshare.com/ndownloader/files/14746730)
Supplement: Supplementary file 1 [file 14746730]

Figure 1.

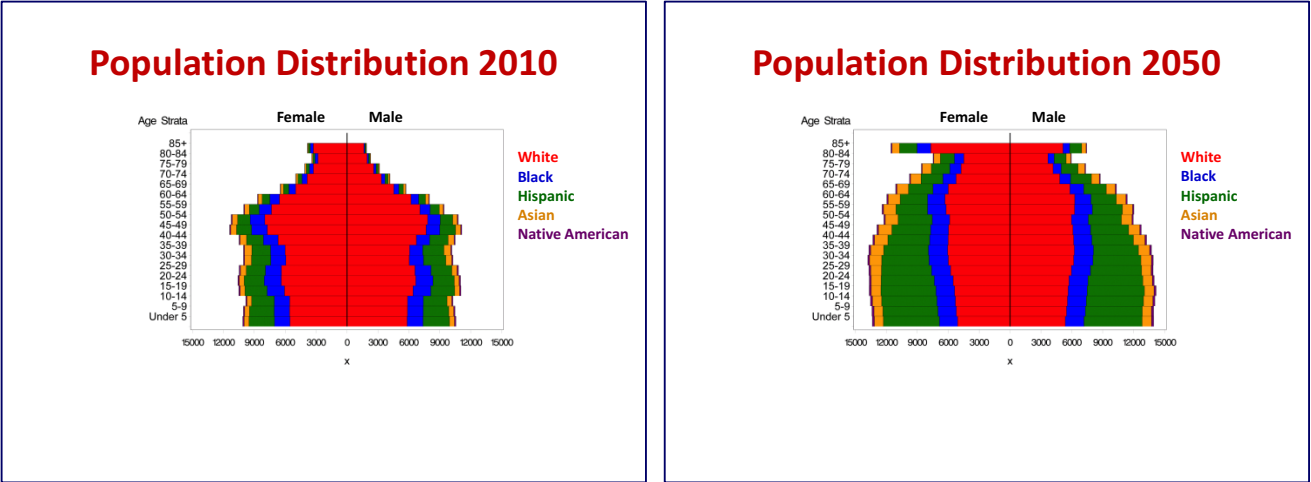

Figure 2.

## Pre-Hospital Triage Pathways for Acute Stroke

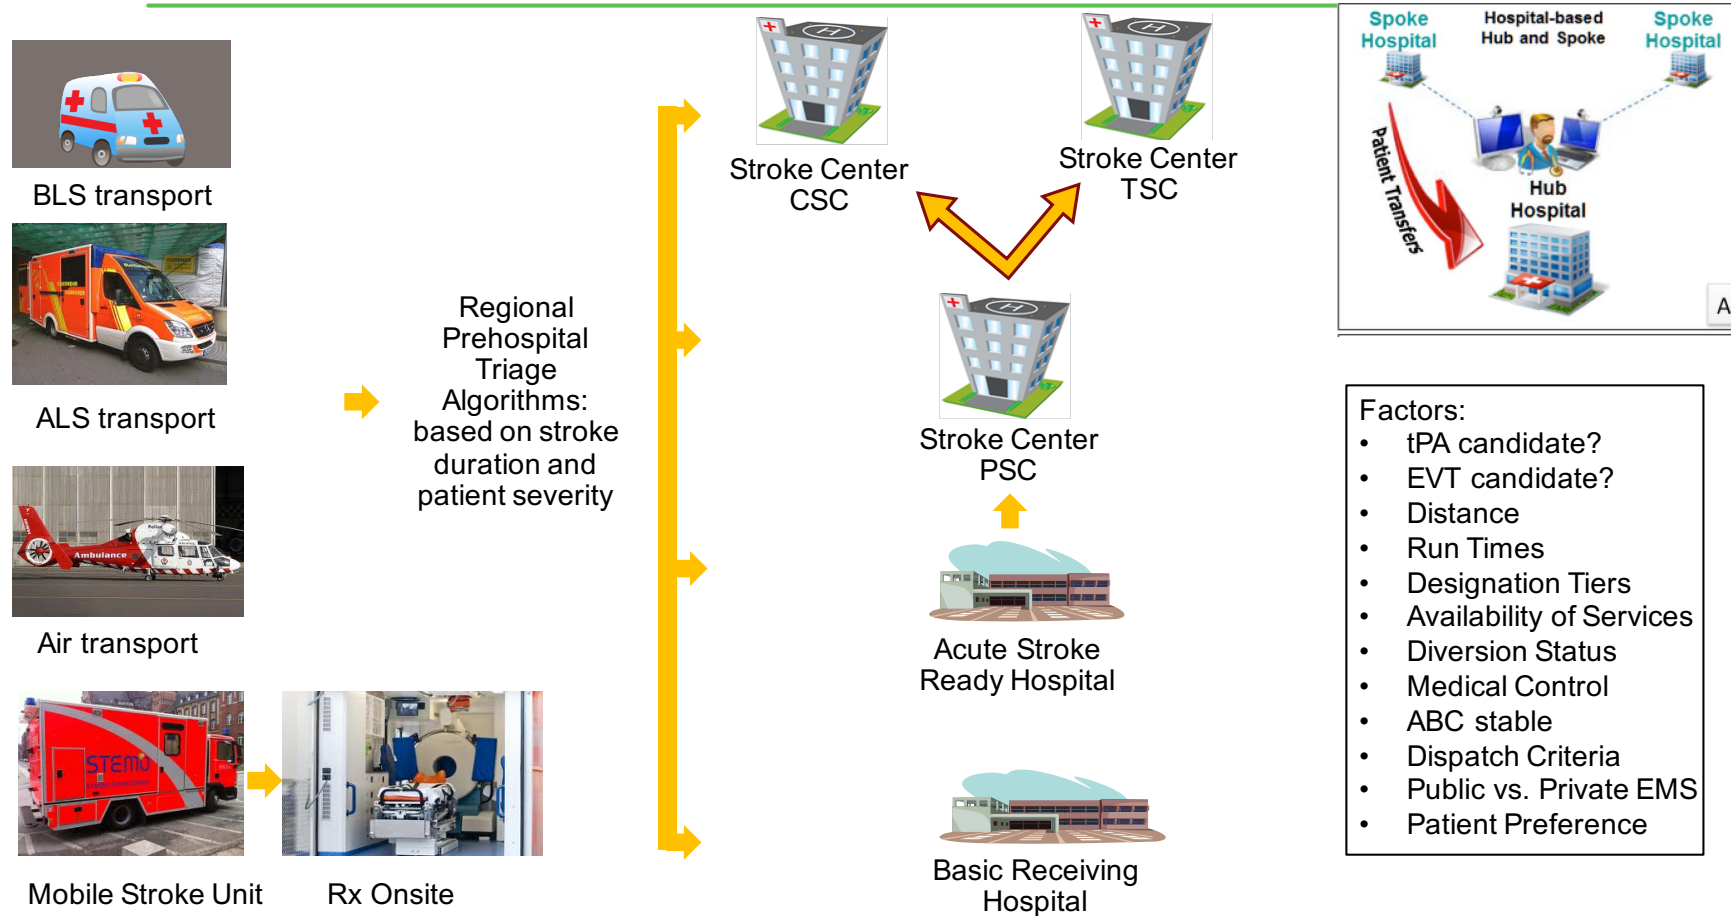

Figure 3.

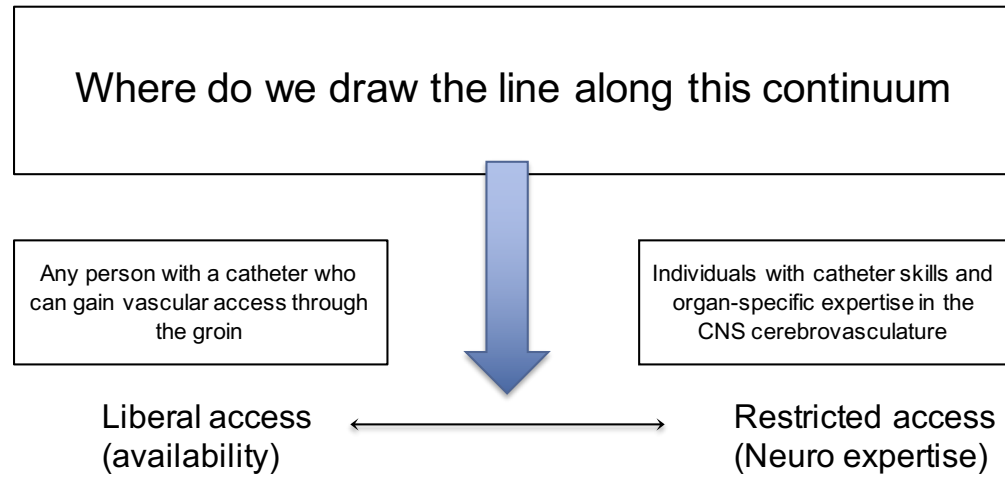

Table 1.

**Table 1. Clinician subspecialty among cases of mechanical thrombectomy for ischemic stroke (Kamel et al. JAMA Neurology 2018;75:51)**

Abbreviation: CMS, Center for Medicare and Medicaid Services  
\*Provider specialty as self-designated at the time of enrollment in Medicare

|                        | No. (%)    |
|------------------------|------------|
| Clinician subspecialty | CMS *      |
| <i>Radiology</i>       | 341 (61.4) |
| <i>Neurosurgery</i>    | 91 (16.4)  |
| <i>Neurology</i>       | 110 (19.8) |
| <i>Other</i>           | 13 (2.4)   |
